# Supplementary material for: Availability, Labeling, and Pricing of Salt-Free/Reduced Packaged Foods and Table Salt Alternatives: A Survey in Klang Valley, Malaysia
Source: Research Square preprint supplement (doi:10.21203/rs.3.rs-6669564/v1), 2025-05-16
Supplement: Supplementary file 1 [file c3bb8bc912389f42e1dae9b9.docx]

**Table 1: Super/Hypermarkets Visited in Klang Valley, Malaysia**

| **Hypermarket/Supermarket** | **Location** | **Coordinates** |
| --- | --- | --- |
| **Aeon Big Hypermarket** | SS16, Subang Jaya | 3.1095° N, 101.4602° E |
| Sri Petaling, Kuala Lumpur | 3.06344° N, 101.69585° E |
| Mid Valley, Kuala Lumpur | 3.11825° N, 101.67777° E |
| **Aeon Supermarket** | IOI Mall Puchong | 3.0348° N, 101.6159° E |
| Jaya One, Petaling Jaya | 2.9897° N, 101.5723° E |
| Taman Maluri, Kuala Lumpur | 3.12619° N, 101.72889° E |
| Bandar Utama, Petaling Jaya | 3.14847° N, 101.61550° E |
| Mid Valley, Kuala Lumpur | 3.11825° N, 101.67777° E |
| Puchong Permai, Puchong | 3.106944°N,101.444444°E |
| Setia Alam, Shah Alam | 3.1288° N, 101.6001° E |
| **B.I.G. Supermarket** | Kota Damansara, Petaling Jaya | 3.106496° N, 101.599574° E |
| **Giant Hypermarket** | Bandar Kinrara, Puchong | 3.027038° N, 101.542640° E |
| Kota Damansara, Petaling Jaya | 3.1455° N, 101.6625° E |
| USJ1, Subang Jaya | 2.9914° N, 101.6144° E |
| **Giant Supermarket** | SS19, Subang Jaya | 3.06539° N, 101.57837° E |
| **Hero Hypermarket** | Puncak Jalil, Kuala Lumpur | 3.02305°N, 101.67641° E |
| Bandar Puteri, Puchong | 2.9824°N, 101.6175°E |
| Batu 14, Puchong | 3.059588° N, 101.596469° E |
| Meranti Jaya, Puchong | 3.060000° N, 101.593056° E |
| TTDI, Petaling Jaya | 3.0186°N,101.5369°E |
| **Jaya Grocer Supermarket** | Setia Alam, Shah Alam | 2.9567°N,101.5528°E |
| SS15, Subang Jaya | 3.1720°N, 101.6644°E |
| USJ1, Subang Jaya | 3.0767°N,101.5477°E |
| SS16, Subang Jaya | 3.0457° N, 101.6182° E |
| Jaya 33, Petaling Jaya | 3.0744°N,101.6503°E |
| Quayside, Shah Alam | 3.127242° N, 101.616615° E |
| **Lotus's Hypermarket** | Ara Damansara, Petaling Jaya | 3.0818° N, 101.5828° E |
| Mutiara Damansara, Petaling Jaya | 3.025586°N,101.618117°E |
| Kelana Jaya, Petaling Jaya | 3.0090° N, 101.5761° E |
| Pusat Bandar Puchong, Puchong | 3.024444°N,101.579167°E |
| Setia Alam, Shah Alam | 3.1375° N, 101.6098° E |
| **Mydin Hypermarket** | USJ1, Subang Jaya | 3.1496°N, 101.6617°E |
| **NSK Hypermarket** | Sri Muda, Shah Alam | 3.10989° N, 101.44846° E |
| Kota Damansara, Petaling Jaya | 3.010802° N, 101.558021° E |
| Taman Jaya, Petaling Jaya | 3.198631° N, 101.618337° E |
| One City, Subang Jaya | 3.0444° N, 101.5260° E |
| USJ1, Subang Jaya | 3.1565°N, 101.6111°E |
| **Village Grocer Supermarket** | Ara Damansara, Petaling Jaya | 3.0652° N, 101.6099° E |
| SS16, Subang Jaya | 3.0507° N, 101.6456° E |
| Setia Alam, Shah Alam | 3.0739°N,101.5170°E |
| Tropicana Avenue, Petaling Jaya | 3.0261°N,101.5811°E |
| Tropicana Gardens, Petaling Jaya | 3.05867° N, 101.59331° E |

**Table 2: Salt-Free/ Reduced and Regular Processed Packaged Foods from Super/Hypermarkets in Klang Valley, Malaysia**

| **Product Name** | **Brand** | **Price per 100g**  **(MYR)** | **Salt per 100g**  **(mg)** |
| --- | --- | --- | --- |
| 4 Bean Mix | SCS | 1.6 | 32 |
| Baked Beans in Tomato Sauce | Campbells | 9.5 | 2,592 |
| Baked Beans in Tomato Sauce (Light) | Ballantyne | 3.2 | 648 |
|  | Promex | 6.8 | 1,296 |
| Baked Beans in Tomato Sauce (One for One) | S&W Premium | 2.9 | 365 |
| Danish Pork Luncheon Meat | Ayam Brand | 32.8 | 8,400 |
| Danish Pork Luncheon Meat (Reduced Sodium) | Paysan & Breton | 34.0 | 4,410 |
| Diced Italian Tomato | Ballantyne | 1.6 | 10 |
| Lentils (No added salt) | SCS | 1.6 | 38 |
| Organic 4 Bean Mix (No added salt) | SCS | 2.3 | 32 |
| Organic Black Beans | Anchor | 2.0 | 8 |
| Organic Diced Italian Tomatoes (No added salt) | Anchor | 1.9 | 9 |
| Organic Lentils (No added salt) | Anchor | 1.9 | 63 |
| Organic Tomato Chopped (No added salt) | Anchor | 2.9 | 9 |
| Ready-Cut Diced Tomatoes | Ballantyne | 6.4 | 309 |
| Ready Cut Diced Tomatoes with No Salt Added | Lurpak | 12.7 | 71 |
| Salt Reduced Baked Beans in Tomato Sauce (One for One) | President | 2.9 | 305 |
| Spam | Ayam Brand | 32.9 | 4,000 |
| Spam Lite | Westgold | 32.9 | 3,000 |
| Tuna with Mayonnaise | Campbells | 4.8 | 296 |
|  | Pacific Foods | 19.2 | 1,184 |
|  | S&W Premium | 18.9 | 1,184 |
| Tuna with Mayonnaise (Light) | Lee Kum Kee | 42.9 | 3,573 |
| Beurre Traditionnel Slow Maturation French Butter | Arla | 20.7 | 30 |
|  | Ayam Brand | 30.7 | 6,000 |
|  | Lurpak | 9.9 | 15 |
| French Butter (Salted) | Heinz | 20.1 | 1,600 |
|  | Nut Walker | 10.4 | 800 |
| French Butter (Unsalted) | Arla | 78.8 | 156 |
| Pure & Creamy Butter | Lee Kum Kee | 20.7 | 1,936 |
|  | Mega Food | 25.7 | 0 |
| Pure Butter (Slightly Salted) | Golden Churn | 18.0 | 1,410 |
| Pure Butter (Unsalted) | Emborg | 5.9 | 5 |
|  | Lurpak | 12.0 | 10 |
| Pure Creamery Butter (Salted) | Kettle | 7.6 | 695 |
|  | Lee Kum Kee | 43.3 | 3,388 |
|  | Natural Chip Co. | 21.0 | 2,085 |
|  | Tyrrell's | 29.3 | 2,780 |
| Pure Creamery Butter (Unsalted) | Naturel | 57.8 | 80 |
| Pure Creamery Butter (Unsalted) | Emborg | 43.3 | 0 |
| Pure Irish Butter | Anchor | 22.2 | 24 |
|  | Nut Walker | 7.6 | 730 |
|  | Planters | 14.6 | 1,460 |
| Pure Irish Butter (Salted) | Springdale Cottage | 23.4 | 2,142 |
| Pure Irish Butter (Unsalted) | Emborg | 23.4 | 0 |
| Pure New Zealand Butter (Salted) | Angel | 52.3 | 4,800 |
|  | Hamadaya | 18.7 | 1,800 |
|  | Kikkoman | 32.1 | 3,000 |
| Pure New Zealand Butter (Unsalted) | Anchor | 6.0 | 10 |
|  | Naturel | 96.1 | 150 |
| Reduced Fat Margarine (Lite) | Elle & Vire | 5.2 | 738 |
|  | Kerrygold | 18.3 | 2,214 |
| Reduced Salt Margarine | Elle & Vire | 3.1 | 394 |
|  | Golden Churn | 19.2 | 2,758 |
| Salted Butter | Hamadaya | 6.7 | 560 |
|  | Heinz | 11.1 | 1,200 |
|  | Kikkoman | 5.2 | 600 |
| Salted Butter | Ayam Brand | 49.4 | 10,000 |
|  | Hamadaya | 74.5 | 6,120 |
|  | Kazimi | 21.1 | 1,620 |
|  | Lee Kum Kee | 12.9 | 1,080 |
| Sea Salt Crystals Salted Butter | Ayam Brand | 48.2 | 7,200 |
| Slightly Salted Butter | Avonmore | 42.2 | 2,880 |
|  | Mega Food | 22.6 | 1,440 |
|  | Westgold | 33.6 | 8,000 |
| Slightly Salted Spreadable | President | 47.0 | 2,160 |
| Soft Margerine | Nutrione (Tong Garden) | 20.0 | 4,914 |
| Tatura Butter (Salted) | Cobs | 12.7 | 1,390 |
|  | Kettle | 20.4 | 2,085 |
|  | Lay's | 6.5 | 695 |
| Tatura Butter (Unsalted) | Lurpak | 39.6 | 36 |
| Traditional Salted Butter | Blue Diamond | 8.6 | 695 |
|  | Love Earth | 18.2 | 1,390 |
|  | Tong Garden | 19.6 | 1,390 |
| Traditional Unsalted Butter | Lurpak | 46.4 | 50 |
| Unsalted Butter | Anchor | 80.0 | 242 |
|  | Beqa | 84.7 | 480 |
|  | Lurpak | 22.3 | 36 |
|  | SCS | 97.7 | 430 |
| Unsalted Spreadable | Emborg | 38.8 | 0 |
|  | Mega Food | 7.9 | 0 |
| Wrapped Salted Butter | Blue Diamond | 7.9 | 695 |
|  | Ceres Organics | 15.8 | 1,390 |
|  | Lay's | 7.8 | 695 |
|  | Rice Up | 22.8 | 2,085 |
| Wrapped Unsalted Butter | Anchor | 43.5 | 45 |
| First Draw Light Soy Sauce | Tulip | 2.3 | 14,128 |
| First Draw Light Soy Sauce (Less Salt) | Maison Lescure | 1.9 | 4,343 |
| Japanese Reduced Salt Soy Sauce | Ballantyne | 3.7 | 5,746 |
|  | Maison Lescure | 3.1 | 5,746 |
|  | Real Farmers | 17.6 | 34,476 |
| Japanese Seasoning Soy Sauce | Mr. Organic | 2.6 | 7,076 |
|  | Wholefoods Market | 7.3 | 21,228 |
|  | Woolworths | 10.8 | 28,304 |
| Light Soy Sauce | Hormel | 5.8 | 30,858 |
|  | Tulip | 9.1 | 44,310 |
| Light Soy Sauce (Less Salty) | Mon Ami | 13.9 | 32,640 |
| Naturally Brewed Soy Sauce | Tulip | 13.4 | 34,165 |
| Naturally Brewed Soy Sauce (Less Salt) | Mon Ami | 3.7 | 3,808 |
| Panda Oyster Sauce | Ayam Brand | 9.7 | 28,680 |
|  | Hormel | 5.2 | 14,340 |
| Panda Oyster Sauce (Less Salty) | Mon Ami | 5.8 | 10,380 |
|  | Westgold | 9.8 | 17,300 |
| Reduced Salt Soy Sauce | Maison Lescure | 6.3 | 22,896 |
| Tomato Ketchup | Ayam Brand | 3.0 | 1,000 |
| Tomato Ketchup (50% less sugar & salt) | Golden Churn | 4.5 | 395 |
| Tomato Ketchup (80% Less salt) | President | 8.3 | 320 |
| All Natural Cocktail Snack (Unsalted) | Arla | 10.7 | 23 |
| Baked Almonds (Unsalted) | Emborg | 13.3 | 2 |
| Baked Cashew Nuts (Unsalted) | Anchor | 13.3 | 7 |
|  | Lurpak | 34.1 | 15 |
| Baked Nuts & Berry Mix (Unsalted) | Emborg | 11.7 | 0 |
| Baked Nuts & Fruit Medley (Unsalted) | Lurpak | 34.1 | 30 |
| Baked Walnuts (Unsalted) | SCS | 13.3 | 25 |
| Brown Rice Cake (Unsalted) | Anchor | 7.4 | 120 |
| Brown Rice Cake with Himalayan Salt | Ayam Brand | 14.8 | 2,600 |
| Dry Roasted Lightly Salted Peanuts | Paysan & Breton | 4.9 | 535 |
| Dry Roasted Salted Peanuts | Campbells | 4.9 | 267 |
| Lightly Salted Almonds | Anchor | 11.4 | 94 |
| Lightly Salted Cashew Nut | Anchor | 12.4 | 74 |
| Lightly Salted hand-cooked English crisps | Westgold | 19.3 | 1,300 |
| Lightly Salted Potato Chips | S&W Premium | 17.6 | 742 |
| Natural Popcorn Lightly Salted & Slightly Sweet | President | 9.9 | 265 |
| Natural Popcorn Sea Salt | S&W Premium | 14.3 | 360 |
| Organic Brown Rice Cakes | Lee Kum Kee | 6.2 | 395 |
| Organic Brown Rice Cakes (No added salt) | Emborg | 6.2 | 1.4 |
| Potato Chips (Classic) | Lee Kum Kee | 8.5 | 427 |
| Potato Chips (Salt & Vinegar) | Nut Walker | 8.5 | 743 |
| Roasted & Unsalted Mixed Nuts | Anchor | 15.2 | 7 |
| Roasted Almonds (Lightly Salted) | Anchor | 17.5 | 143 |
| Roasted Almonds (Salted) | S&W Premium | 17.5 | 303 |
| Roasted Salted Cashews | Ballantyne | 13.0 | 182 |
| Roasted Unsalted Cashews | Emborg | 13.0 | 0 |
| Salted Cocktail Nuts | Ballantyne | 9.4 | 55 |
| Sea Salt & Cider Vinegar hand-cooked English crisps | Ayam Brand | 19.3 | 3,600 |
| Sea Salt & Vinegar Potato Chips | Lee Kum Kee | 17.6 | 894 |
|  | Natural Chip Co. | 10.9 | 668 |
|  | Real Good | 10.9 | 668 |
| Sea Salt Potato Chips | Lee Kum Kee | 21.8 | 828 |
| Organic Free Range Chicken Broth | Campbells | 5.1 | 440 |
| Organic Free Range Chicken Broth (Low Sodium) | Arla | 5.1 | 40 |
| Real Stock Beef Stock | Golden Churn | 1.6 | 449 |
|  | Lee Kum Kee | 3.3 | 898 |
| Real Stock Beef Stock Reduced Salt | President | 1.6 | 320 |
| Real Stock Chicken Stock | Lee Kum Kee | 5.0 | 1,341 |
| Real Stock Chicken Stock Reduced Salt | Anchor | 3.3 | 500 |
| Real Stock Vegetable Stock | Hamadaya | 1.6 | 542 |
| Real Stock Vegetable Stock Reduced Salt | Elle & Vire | 5.0 | 1,170 |

**Table 3: Labeled Table Salt and Alternative from Super/Hypermarkets and Online Stores in Klang Valley, Malaysia**

| **Product Name** | **Brand** | **Price per 100 g**  **(MYR)** | **Sodium per 100 g**  **(mg)** |
| --- | --- | --- | --- |
| Himalayan Pink Rock Salt (Bag) | Akasa | 0.9 | 19,442 |
| Himalayan Pink Rock Salt (Bottle) |  | 4.8 | 38,884 |
| Iodised Salt | Avina | 0.1 | 98,000 |
| Iodised Himalayan Refined Rock Salt | Bestari | 0.7 | 97,000 |
| 84 Live Sea Salt | Biogreen | 14.6 | 10,410 |
| Iodised Himalayan Pink Rock Salt | CED | 6.5 | 79,120 |
| Iodised Himalayan White Salt |  | 2.5 | 49,450 |
| Natural Himalayan White Salt |  | 0.5 | 96,410 |
| Iodised Table Salt | Cerebos | 1.9 | 39,000 |
| Organic Lake Salt | Deborah | 4.8 | 39,231 |
| French Celtic Salt | Earth Gift | 5.0 | 520 |
| Iodized Himalayan Rock Salt | Earth Living | 0.6 | 40,000 |
| Korean Bamboo Salt |  | 13.0 | 6,976 |
| Iodized Australia Lake Salt | Earth Organic | 1.2 | 39,000 |
| Lake Salt | Fine Foods | 2.6 | 38,800 |
| Lake Salt (Light, 50% less sodium) |  | 3.6 | 19,666 |
| Iodised Salt with Minerals & Nutrients | Good Salt | 4.3 | 38,500 |
| K-Salt |  | 2.1 | 40,060 |
| Celtic Sea Salt | Grains & Salt | 12.9 | 63,076 |
| Himalaya Mineral Rock Salt | Hilo Organic | 0.6 | 58,000 |
| Himalaya Crystal Salt | Himalaya Food | 0.6 | 98,000 |
| Himalaya Rock Salt |  | 0.5 | 98,000 |
| Himalayan Pink Rock Salt | Idafood | 0.5 | 98,760 |
| Food-grade Potassium Chloride Powder | KHL | 5.0 | 0 |
| Black Truffle Table Salt | La Rustichella | 39.6 | 400 |
| Himalayan Rock Salt | Lohas | 0.0 | 38,180 |
| Organic Ocean Sea Salt |  | 1.3 | 39,000 |
| French Sea Salt | Love Earth | 14.7 | 1,400 |
| Himalaya Mineral Rock Salt |  | 2.5 | 15,200 |
| Korea Bamboo Salt |  | 48.3 | 15,466 |
| Natural Himalaya Rock Salt | Ma Ma Mi | 1.2 | 19,360 |
| Organic Himalayan Rock Salt (Iodised) | Mewah | 0.7 | 38,955 |
| Iodized Salt | Morton | 2.0 | 39,333 |
| Iodized Sea Salt |  | 49.8 | 81,538 |
| Lite Salt (50% Less Sodium) |  | 14.7 | 41,428 |
| Plain Salt Substitute |  | 28.1 | 49,285 |
| Season All Seasoned Salt |  | 7.5 | 31,818 |
| Food-grade Potassium Chloride Powder | MYELEMENTS | 3.8 | 0 |
| Iodised Fine Salt | Myrasa | 0.1 | 38,700 |
| Himalayan Rock Salt Coarse | Nature Quest | 5.2 | 12,600 |
| Himalayan Rock Salt Fine |  | 6.9 | 14,400 |
| Iodised French Sea Salt Coarse |  | 12.3 | 17,940 |
| Iodised French Sea Salt Fine |  | 15.9 | 19,020 |
| Iodised Portugese Sea Salt |  | 7.8 | 19,443 |
| Nosalt | Nosalt | 27.4 | 49,230 |
| Nu-Salt Salt Substitute | Nu-Salt | 36.1 | 0 |
| Himalayan Rock Salt Coarse | Ohalo | 0.6 | 97,000 |
| Himalayan Rock Salt Fine |  | 0.6 | 97,000 |
| Natural Himalayan Rock Salt | OM | 1.2 | 19,736 |
| Natural Pink Himalayan Rock Salt (Fine) |  | 1.1 | 38,000 |
| Himalaya Pink Rock Salt | Organic Fields | 1.2 | 77,334 |
| Iodised Hand-Harvested Portuguese Sea Salt | Organic Spring | 4.7 | 74,000 |
| Traditional Hand-Harvested Portuguese Sea Salt (Coarse) |  | 4.4 | 19,400 |
| Pansalt | Pansalt | 4.4 | 38,367 |
| Gourmet Sea Salt | Radiant | 4.7 | 18,690 |
| Portuguese Sea Salt (Fine) |  | 3.8 | 18,132 |
| Himalaya Rock Salt | Saji | 1.9 | 29,871 |
| Himalayan Pink Rock Salt (Lite) | Salt Sense | 15.1 | 18,899 |
| Lite Sea Salt |  | 12.1 | 16,530 |
| Natural French Sea Salt |  | 9.2 | 23,800 |
| Natural Sea Salt (Coarse Grain) |  | 3.5 | 20,400 |
| Iodised Red Sea Salt | Sasa | 13.7 | 77,500 |
| Iodised Sea Salt | Sosalt | 1.0 | 38,666 |
| Potassium Chloride Powder | Source Nutrition | 55.9 | 0 |
| All Natural Himalayan Black Salt | Sun Nature | 4.1 | 40,000 |
| All Natural Himalayan Pink Salt |  | 4.1 | 97,600 |
| Food-grade Potassium Chloride Powder | Take It Global Sdn Bhd | 4.0 | 0 |
| Garlic Salt | Waitrose & Partners | 10.5 | 81,890 |
| Himalayan Iodised White Salt | Za'ara | 0.4 | 98,900 |
| Himalayan Crystal Rock Salt | Zenxin Organic | 0.6 | 38,000 |

**Table 4: Commonly Consumed Processed Packaged Foods from Supermarkets in Klang Valley, Malaysia**

| **Product Name** | **Brand** | **Price per 100g (MYR)** | **Salt per 100g**  **(mg)** |
| --- | --- | --- | --- |
| Baked Beans in Tomato Sauce | Marina | 0.9 | 302 |
|  | Heinz | 1.6 | 246 |
| Bolognese Pasta Sauce | Leggo's | 2.7 | 353 |
| Bran & Wheatgerm Bread | Gardenia | 0.8 | 450 |
| Chicken Nuggets | Tyson | 2.7 | 534 |
| Chili Sauce | Life | 1.2 | 1,210 |
|  | Maggi | 1.2 | 980 |
| Cream Crackers | Hup Seng | 1.2 | 548 |
|  | Jacobs | 4.0 | 273 |
|  | Munchy's | 1.8 | 519 |
| Homestyle Pasta Sauce (Bolognese & Mushroom) | San Remo | 2.2 | 360 |
| Instant Noodles (Chicken Flavour) | Maggi, | 1.4 | 1,919 |
|  | Mamee |  | 1,745 |
|  | Mi Sedaap | 1.9 | 1,370 |
| Instant Noodles (Curry Flavour) | Maggi | 1.4 | 1,670 |
|  | Mamee | 1.1 | 1,775 |
|  | Mi Sedaap | 1.7 | 1,370 |
| Instant Oatmeal | Captain | 1.3 | 23 |
|  | Quaker | 1.3 | 6 |
| Margarine | Adela | 1.7 | 452 |
|  | Daisy | 2.1 | 880 |
|  | Planta | 2.5 | 779 |
| Nestum Original | Nestle | 1.9 | 209 |
| Original Classic White Bread | Gardenia | 0.7 | 515 |
| Potato Chips (Hot & Spicy) | Mr. Potato | 3.8 | 1,033 |
|  | Pringles | 6.9 | 628 |
| Potato Chips (Original Flavour) | Mr. Potato | 3.8 | 917 |
|  | Pringles | 6.6 | 613 |
| Potato Chips (Sour Cream Flavour) | Mr. Potato | 3.9 | 826 |
|  | Pringles | 7.6 | 482 |
| Sardines in Tomato Sauce | Ayam Brand | 2.4 | 360 |
|  | TC Boy | 1.8 | 300 |
| Stax Potato Chips (Original Flavour) | Lay's | 5.0 | 476 |
| Stax Potato Chips (Sour Cream Flavour) | Lay's | 5.0 | 599 |
| Tempura Chicken Nuggets | Ayamas | 2.1 | 335 |
|  | First Pride | 2.3 | 424 |
| The Original Sprouted 3-Seeds Bread | Rainbows Health Food | 2.3 | 339 |
| The Original Sprouted 7-Grains Bread | Rainbows Health Food | 2.3 | 303 |
| Tomato Ketchup | Maggi | 1.0 | 1,240 |
| Tomato Sauce | Life | 1.1 | 1,040 |
| Traditional Pasta Sauce (Bolognese) | Prego | 2.0 | 350 |
| Wholemeal Bread with Canadian Purple Wheat | Gardenia | 1.1 | 451 |
| Wholewheat Bread | Gardenia | 1.0 | 438 |
